# Supplementary material for: Coordination polymers based on di-9,10-(pyridine-4-yl)-anthracene: selective adsorption of CO2 and fluorescent properties
Source: Royal Society of Chemistry journal article supplement (doi:10.1039/d2ce01570f), 2023-01-01
Supplement: d2ce01570f1.pdf [file d2ce01570f1.pdf]

## Supplementary Information

### **Coordination polymers based on di-9,10-(pyridine-4-yl)-anthracene: selectively adsorbing CO<sub>2</sub> and fluorescent properties**

Ji-Ming Xi,<sup>a</sup> Rui Zhu,<sup>a</sup> Yu-Kang Teng,<sup>a</sup> Qian Wu,<sup>a</sup> Meng-Yuan Xu,<sup>a</sup> Rui Zhang,<sup>b\*</sup>

Zhen-Zhong Lu,<sup>a\*</sup> Ling Huang<sup>c</sup>

<sup>a</sup> Key Laboratory of Flexible Electronics (KLOFE) & Institute of Advanced Materials (IAM),  
Nanjing Tech University (NanjingTech), 30 South Puzhu Road, Nanjing 211800, China.

<sup>b</sup> School of Chemistry and Chemical Engineering, Suzhou university, Education Park, Suzhou,  
Anhui, 234000, China.

<sup>c</sup> College of Chemistry, Xinjiang University, 666 Shengli Road, Urumqi, Xinjiang, 830046, China.

Table 1. Crystal and Structure Refinement Data for compound 1-4.

|                                        | 1                                                 | 2                                                                             | 3                                                                                | 4                                                                               |
|----------------------------------------|---------------------------------------------------|-------------------------------------------------------------------------------|----------------------------------------------------------------------------------|---------------------------------------------------------------------------------|
| Empirical formula                      | C <sub>26</sub> H <sub>16</sub> CoNO <sub>4</sub> | C <sub>80</sub> H <sub>44</sub> Co <sub>2</sub> N <sub>2</sub> O <sub>8</sub> | C <sub>24</sub> H <sub>16</sub> Cd <sub>0.5</sub> Cl <sub>2</sub> N <sub>2</sub> | C <sub>24</sub> H <sub>20</sub> CdCl <sub>2</sub> N <sub>2</sub> O <sub>2</sub> |
| Formula weight                         | 465.33                                            | 1220.15                                                                       | 459.51                                                                           | 551.72                                                                          |
| Temperature (K)                        | 296                                               | 296                                                                           | 295                                                                              | 297                                                                             |
| Diffrn. wavelength (Å)                 | 0.71073                                           | 0.71073                                                                       | 0.71076                                                                          | 0.71073                                                                         |
| Crystal system                         | tetragonal                                        | triclinic                                                                     | triclinic                                                                        | monoclinic                                                                      |
| Space group                            | <i>I4/m</i>                                       | <i>P</i> -1                                                                   | <i>P</i> -1                                                                      | <i>P2</i> <sub>1</sub> / <i>c</i>                                               |
| <i>a</i> (Å)                           | 15.208(1)                                         | 17.807(3)                                                                     | 8.942(7)                                                                         | 13.403(3)                                                                       |
| <i>b</i> (Å)                           | 15.208(2)                                         | 19.530(3)                                                                     | 10.101(8)                                                                        | 8.610(2)                                                                        |
| <i>c</i> (Å)                           | 18.172(2)                                         | 19.611(4)                                                                     | 12.964(10)                                                                       | 9.713(2)                                                                        |
| <i>a</i> (°)                           | 90                                                | 95.97(5)                                                                      | 88.57(2)                                                                         | 90                                                                              |
| <i>β</i> (°)                           | 90                                                | 114.76(4)                                                                     | 89.81(3)                                                                         | 97.52(6)                                                                        |
| <i>γ</i> (°)                           | 90                                                | 90.71(4)                                                                      | 83.80(4)                                                                         | 90                                                                              |
| <i>V</i> , Å <sup>3</sup>              | 4202.6(10)                                        | 6147.8(18)                                                                    | 1163.7(16)                                                                       | 1111.3(4)                                                                       |
| <i>Z</i>                               | 4                                                 | 2                                                                             | 2                                                                                | 2                                                                               |
| $\rho_{\text{calc}}$ Mg/m <sup>3</sup> | 0.735                                             | 0.693                                                                         | 0.494                                                                            | 1.649                                                                           |
| $\mu$ , mm <sup>-1</sup>               | 0.425                                             | 0.302                                                                         | 0.96                                                                             | 1.247                                                                           |
| F(000)                                 | 952                                               | 1320                                                                          | 157                                                                              | 552                                                                             |
| Refl. collected                        | 16225                                             | 49862                                                                         | 5654                                                                             | 8814                                                                            |
| Independent refl.                      | 2141                                              | 27742                                                                         | 3801                                                                             | 2607                                                                            |
| Final indices(R <sub>1</sub> )         | 0.0456                                            | 0.0419                                                                        | 0.01065                                                                          | 0.0318                                                                          |
| (all data) wR <sub>2</sub>             | 0.1612                                            | 0.0905                                                                        | 0.3545                                                                           | 0.0761                                                                          |
| GOOF                                   | 1.010                                             | 1.006                                                                         | 1.553                                                                            | 1.038                                                                           |

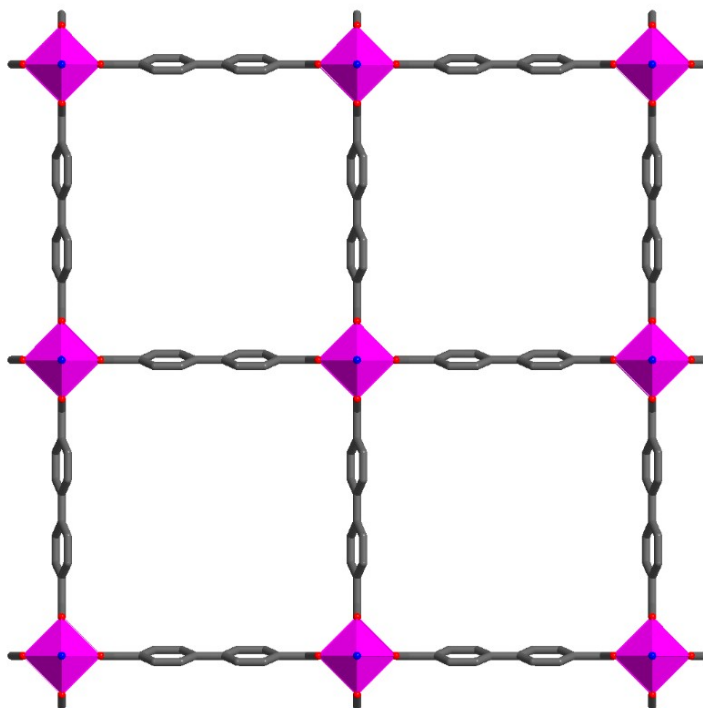

Figure S1. A diagram showing the  $\text{Co}_2(\text{bpda})_2$  ( $\text{bpda} = 4,4'$ -biphenyldicarboxylic acid) layer structure in **1** (C, grey; O, red; Co, pink).

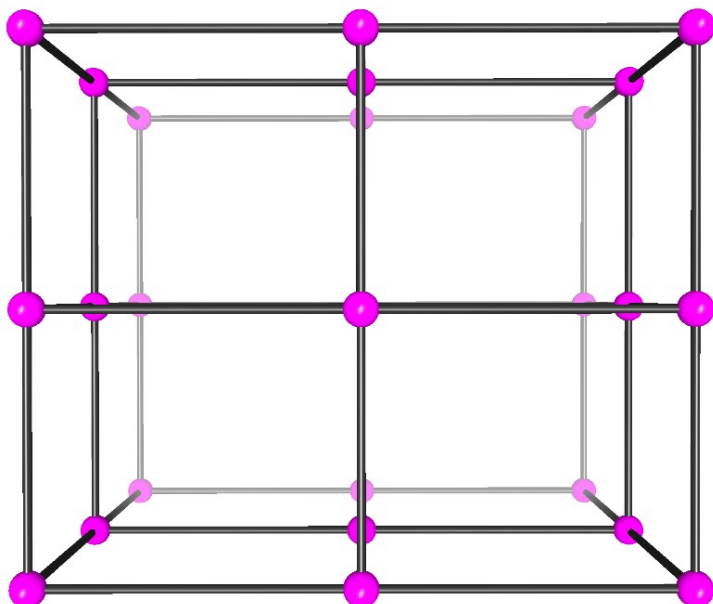

Figure S2. A diagram showing the topology of *pcu* for the 3D network in **1** following the classification from *RCSR* (reticular chemistry structure resource, the binuclear  $\text{Co}_2$  units are shown as pink balls and organic ligands are shown as dark gray sticks).

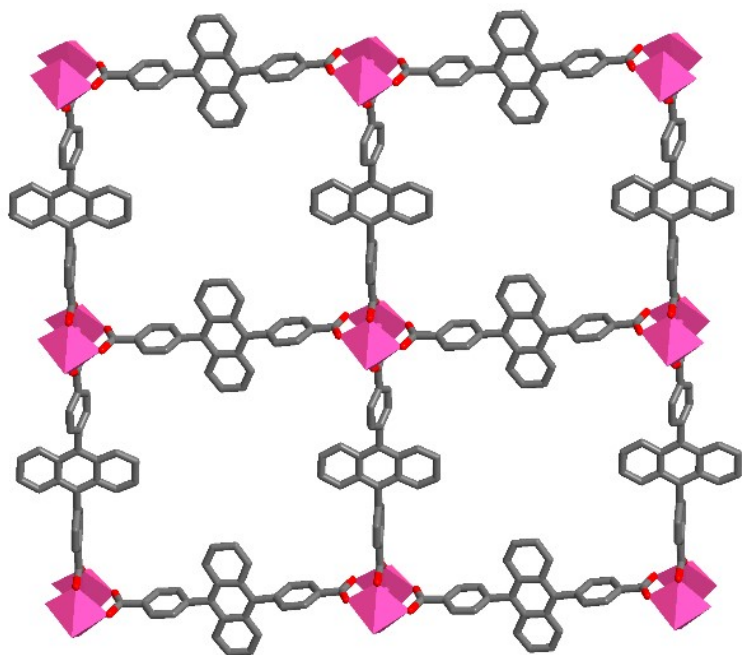

Figure S3. The  $\text{Co}_2(\text{dcpa})_2$  ( $\text{dcpa} = 9,10\text{-Di}(4\text{-carboxyphenyl})\text{anthracene}$ ) layer structure in **2** (C, grey; O, red; Co, pink polyhedron).

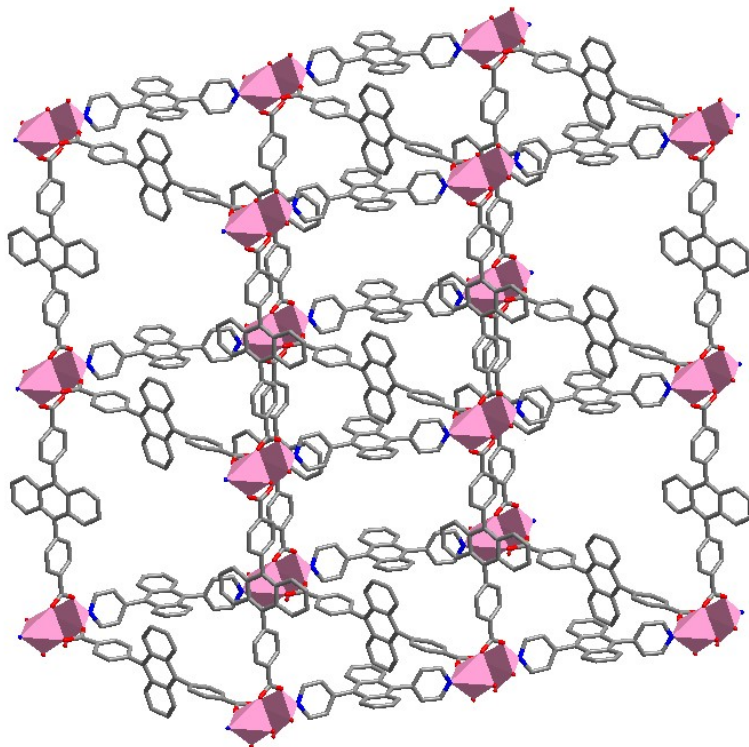

Figure S4. The 3-dimensional open network in **2** (C, grey; O, red; N, blue; Co, pink polyhedron).

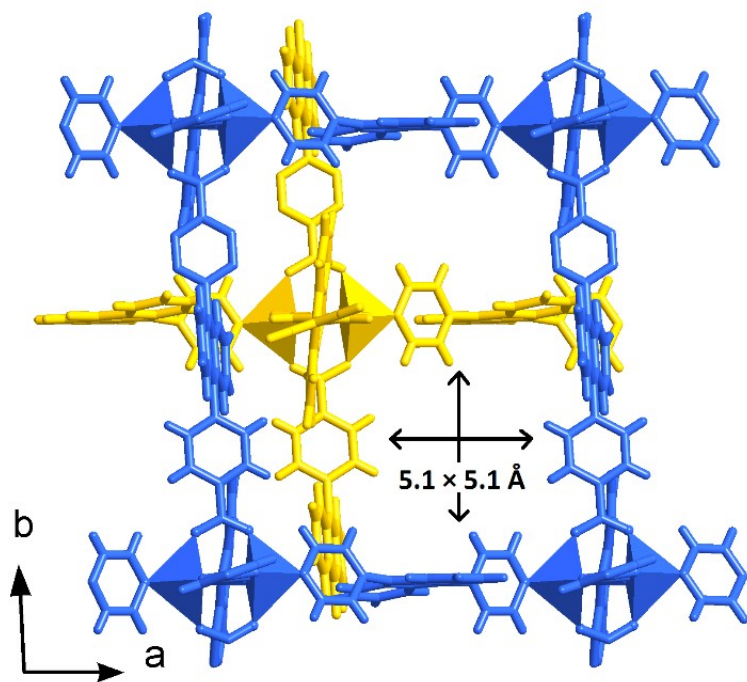

Figure S5. 1D channel of pore size of  $5.1 \times 5.1 \text{ \AA}$  along the  $c$  direction formed between two interpenetrated networks in **2**.

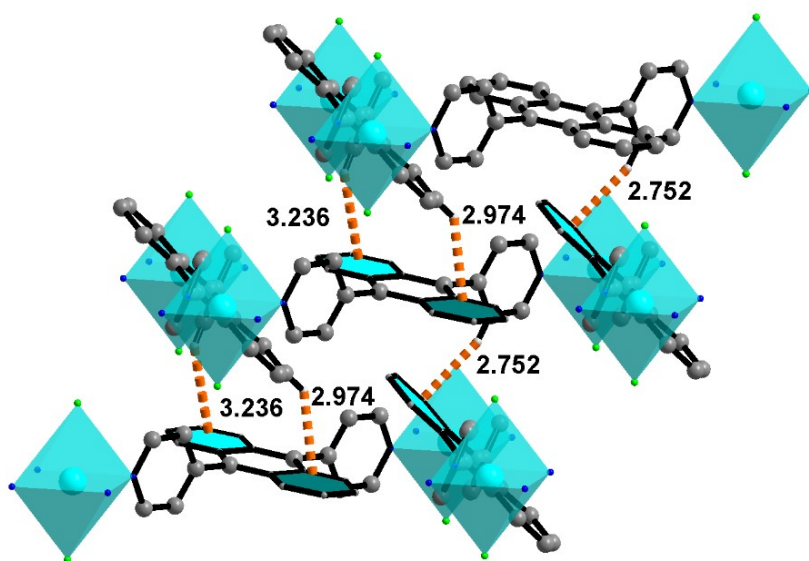

Figure S6. The  $\text{C-H}\cdots\pi$  interactions formed between the pyridyl and anthracene groups, and between anthracene groups from adjacent layers in **3** (C, gray; H, light gray; N, blue; Cd, cyan; Cl, green,  $\text{C-H}\cdots\pi$  interactions are shown in orange dashed lines).

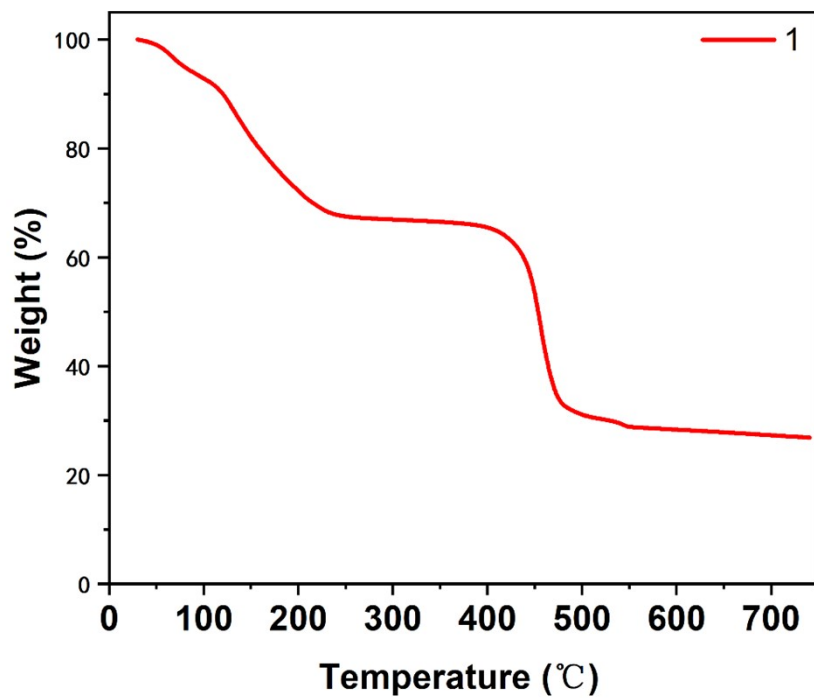

Figure S7. TG profile of **1**.

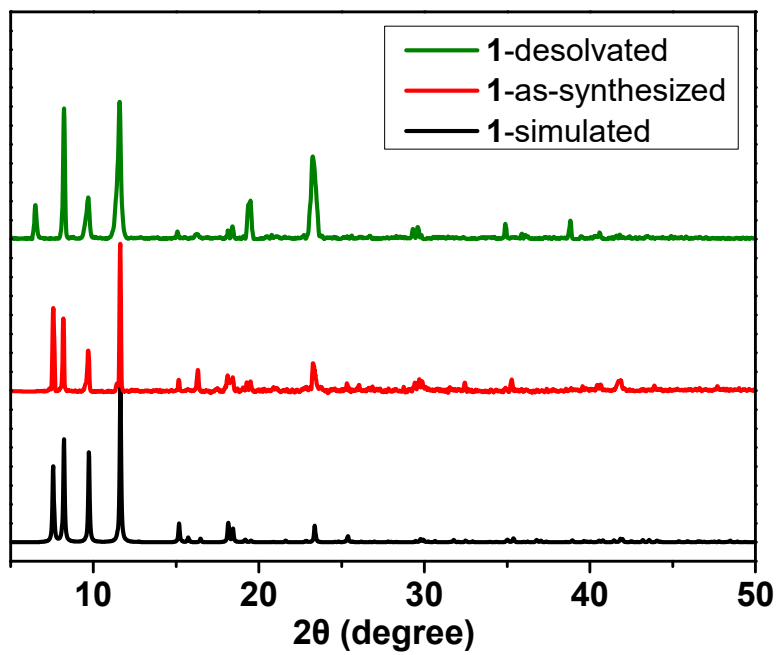

Figure S8. Powder XRD of as-synthesized and de-solvated sample of **1**.

### Estimation of pore volume of **1** based on single-crystal structure of as-synthesized sample

The accessible volume calculated by *PLATON* is  $2057 \text{ \AA}^3$  ( $2.057 \times 10^{-21} \text{ cm}^3$ ) per unit cell using a probe of radius of  $1.2 \text{ \AA}$ .

The mass of one unit cell is  $3.088 \times 10^{-21} \text{ g}$  without solvent guests (crystal\_density\_diffn is  $0.735 \text{ g}\cdot\text{cm}^{-3}$ , unit cell volume is  $4202 \text{ \AA}^3$  ( $4.202 \times 10^{-21} \text{ cm}^3$ ),  $0.735 \times 4.202 \times 10^{-21} = 3.088 \times 10^{-21} \text{ g}$ ).

The pore volume of **1** calculated based on single crystal structure of as-synthesized sample is  $0.666 \text{ cm}^3\cdot\text{g}^{-1}$  ( $2.057 \times 10^{-21} \text{ cm}^3 / 3.088 \times 10^{-21} \text{ g}$ ).

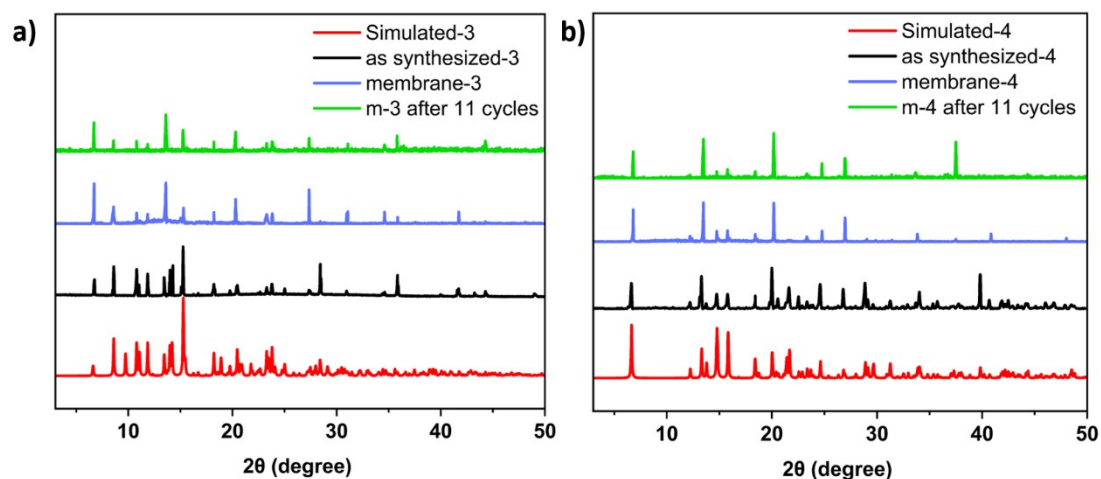

Figure S9. (a) (b) Powder XRD of sample **3**, **4** and **m-3**, **m-4** and **m-3**, **m-4** after 11 cycles of detecting tests.

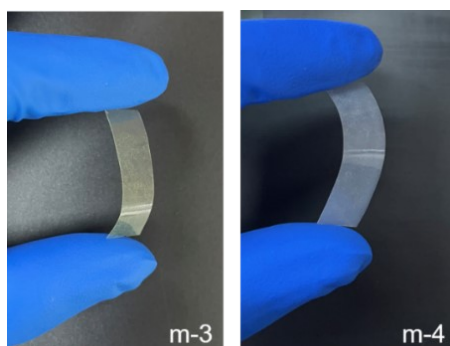

Fig. S10 The picture of **m-3** and **m-4**.

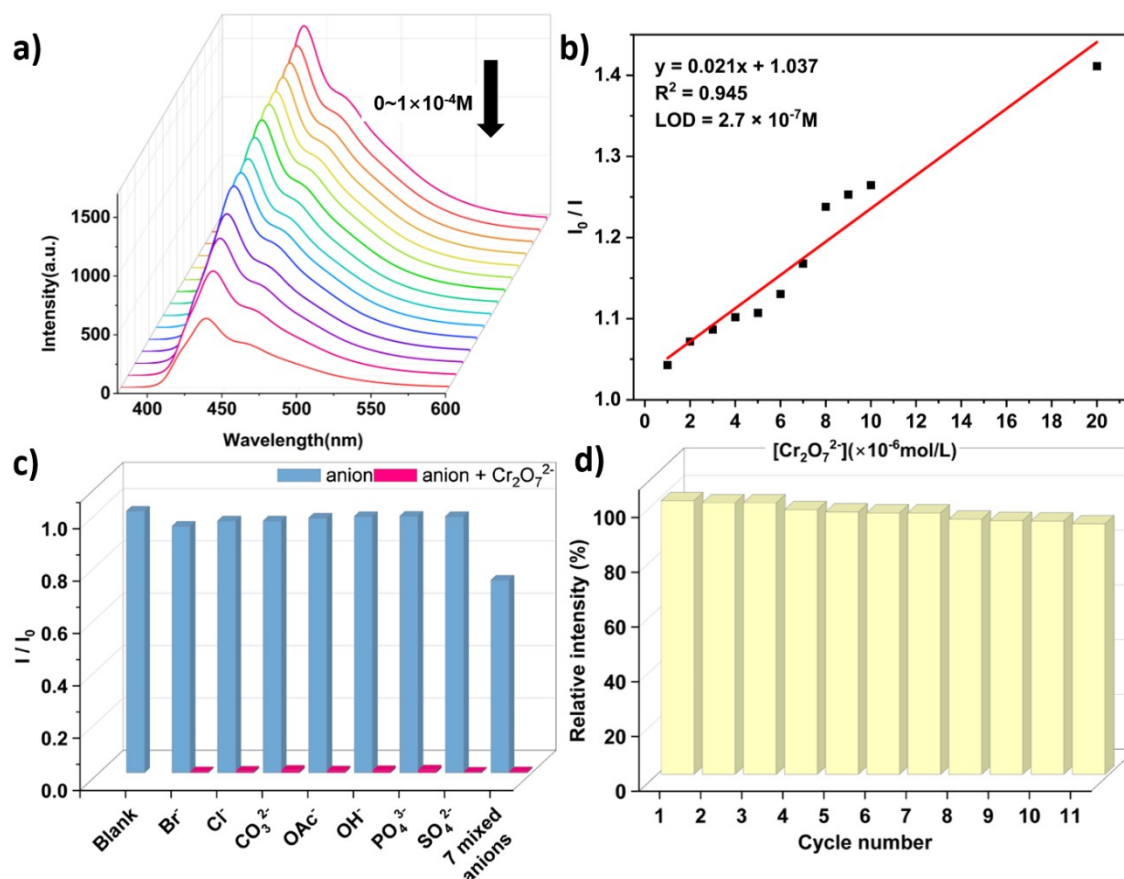

Fig. S11 (a) Fluorescence quenching of **m-4** towards different concentrations of the  $\text{Cr}_2\text{O}_7^{2-}$  solution ( $0 \sim 1.0 \times 10^{-4} \text{ mol} \cdot \text{L}^{-1}$ ,  $\lambda_{\text{ex}} = 365 \text{ nm}$ ). (b) Stern–Volmer plot of  $I_0/I$  vs. concentration of the  $\text{Cr}_2\text{O}_7^{2-}$  solution for **m-4**. (c) Relative fluorescence intensity of **m-4** dispersed in aqueous solutions of interfering anions (blue) and subsequent addition of  $\text{Cr}_2\text{O}_7^{2-}$  (pink). (d) The variations of relative fluorescence intensity of **m-4** for detecting  $\text{Cr}_2\text{O}_7^{2-}$  under 11 cycles.

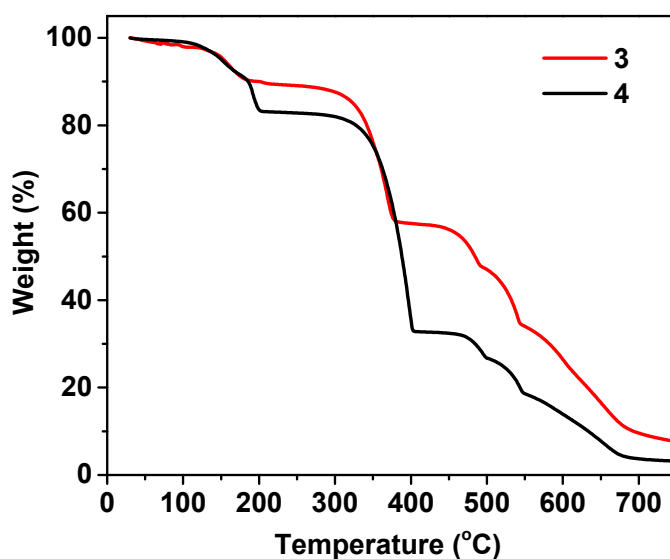

Fig. S12. TG curves for complexes **3** and **4**.



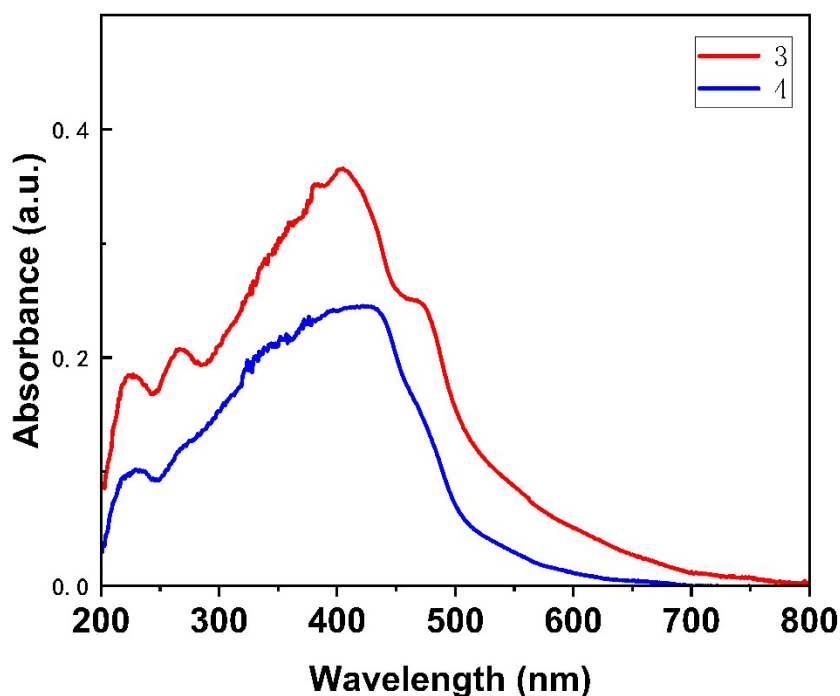

Fig. S13. The Solid UV absorption spectra of 3 and 4.

#### Preparation of mixed matrix membranes m-3 and m-4:

Submicron CPs particles were prepared according to the reference with slight modifications,<sup>1,2,3</sup> and the preparation procedures of **m-3** and **m-4** were the same. The crystals of 3 (50 mg) are soaked in liquid nitrogen for 20 min and then ground with an agate mortar. The ground sample is then dispersed in dichloromethane (DCM, 10 ml), where a small fraction of the micron-sized crystals was settled while most of the submicron-sized crystals remain in suspension and are subsequently sucked out and vacuum-dried at room temperature. Then, dissolve PMMA (0.3g) in acetone (3.0mL) and sonicated for 30 minutes to obtain a viscous solution. Submicron crystal 3 (0.03g) was added to the acetone solution of PMMA, followed by ultrasonic for 30 minutes to obtain a homogeneous dispersion uniform solution, and finally the solution was dropwise cast onto a glass plate and scraped flat with a spatula, and dried overnight at room temperature to obtain an unsupported film.

## Reference

- 1 G. P. Liu, V. Chernikova, Y. Liu, K. Zhang, Y. Belmabkhout, O. Shekhah, C. Zhang, S. L. Yi, M. Eddaoudi and W. J. Koros, *Nat. Mater.*, 2018, **17**, 283.
- 2 R. J. Lin, L. Ge, L. Hou, E. Strounina, V. Rudolph and Z. H. Zhu, *ACS Appl. Mater. Interfaces*, 2014, **6**, 5609.
- 3 X. Zhang, Q. Zhang, D. Yue, J. Zhang, J. T. Wang, B. Li, Y. Yang, Y. J. Cui and G. D. Qian, *Small*, 2018, **14**, 1801563.
